# Supplementary material for: Neuroblastoma cells depend on HDAC11 for mitotic cell cycle progression and survival
Source: PubMed Central journal article supplement (PMC5386552; doi:10.1038/cddis.2017.49), 2017-03-02

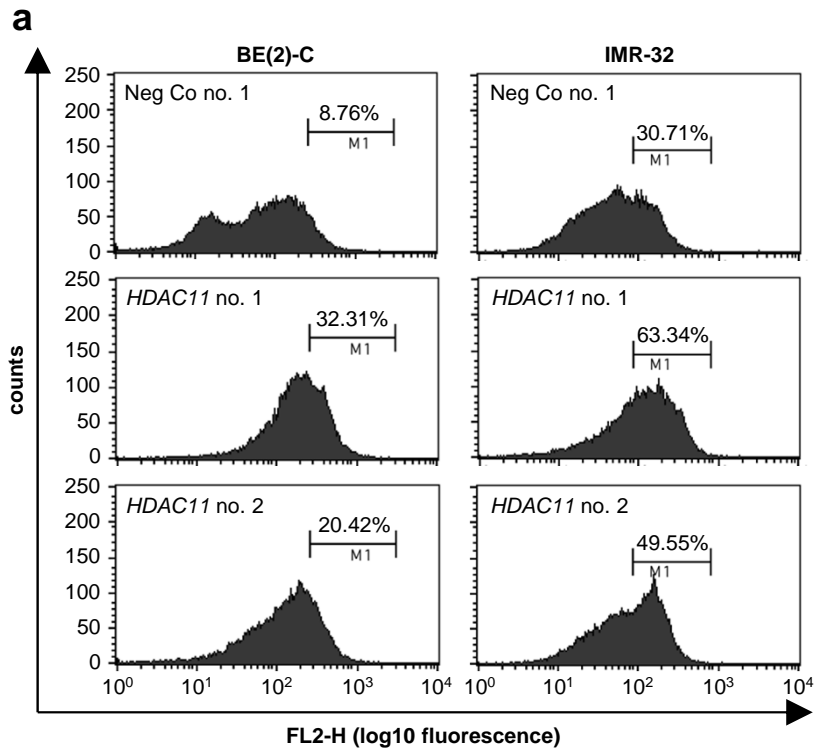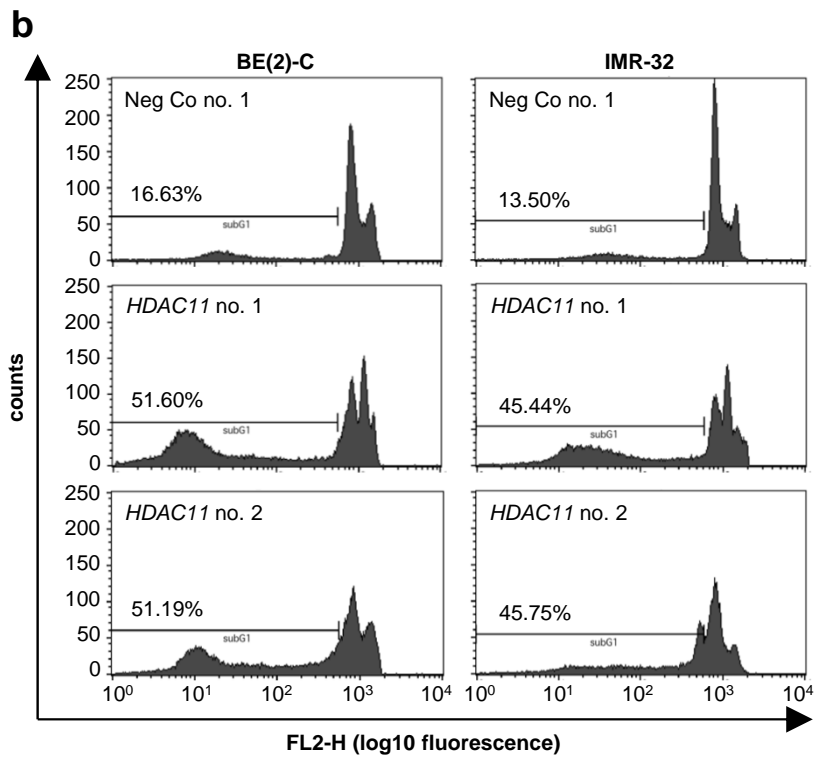

Supplement: cddis201749x5.pdf [file cddis201749x5.pdf]
